# Supplementary material for: Quantitative Evaluation of Nucleic Acid Degradability of Copper Alloy Surfaces and Its Correlation to Antibacterial Activity
Source: MDPI journal article supplement (doi:10.3390/antibiotics10121439), 2021-11-24
Supplement: s1 [file s1]

Table S1. Results of surface analysis of commercially available antibacterial resins (wt%).

| element | Resin X    | Resin X    |
|---------|------------|------------|
| C       | 93.51±0.34 | 97.63±1.24 |
| O       | 3.28±0.26  | 0.66±1.32  |
| Ti      | 0.96±0.09  | 0.54±0.02  |
| Zn      | 1.17±0.25  | -          |
| Ba      | 1.23±0.14  | 0.71±0.07  |
| Mg      | -          | 0.10±0.01  |
| Na      | -          | 0.17±0.01  |
| Ag      | -          | 0.03±0.03  |
| Al      | 0.11±0.03  | 0.09±0.01  |
| Si      | 0.05±0.02  | 0.05±0.01  |

Antimicrobial resin specimens were prepared from the commercially available toilet seats and lids. Surface analysis was carried out using a scanning electron microscope (SEM, Hitachi SU-8000) equipped by the energy dispersive X-ray spectroscopy (EDX, Bruker Quantax 70).

Table S2. Corrosion parameters of copper and its alloys in 0.9% NaCl.

|                                                 | C1020     | C6932     | CBRA      | CBRI      | ABSS        |
|-------------------------------------------------|-----------|-----------|-----------|-----------|-------------|
| $E_{\text{corr}}$ vs NHE(mV)                    | 62.8±9.8  | 57.8±12.1 | 71.8±7.1  | 45.6±9.2  | 138.0±9.4   |
| $I_{\text{corr}}$ ( $\mu\text{A}/\text{cm}^2$ ) | 2.65±1.00 | 0.42±0.32 | 0.29±0.15 | 0.70±0.15 | 0.052±0.001 |
| $E_{\text{pitt}}$ vs NHE(mV)                    | -         | -         | -         | -         | 582±9       |

Electrochemical measurement condition was as follows;

Reference electrode: saturated Ag/AgCl (3 M NaCl)

Counter electrode: a platinum mesh

Working electrode: a test sample (exposed area of 0.95 cm<sup>2</sup>)

Environment: 5 ml 0.9% NaCl, 35±1 °C.

Conditions: OCP for 24 h, PD at 1 mV/s from -0.25 V vs. OCP to the current density over  $1 \times 10^{-3}$  A/cm<sup>2</sup>

Potentiostat: ALS Model2323 bi-potentiostat

Number of measurement: >3

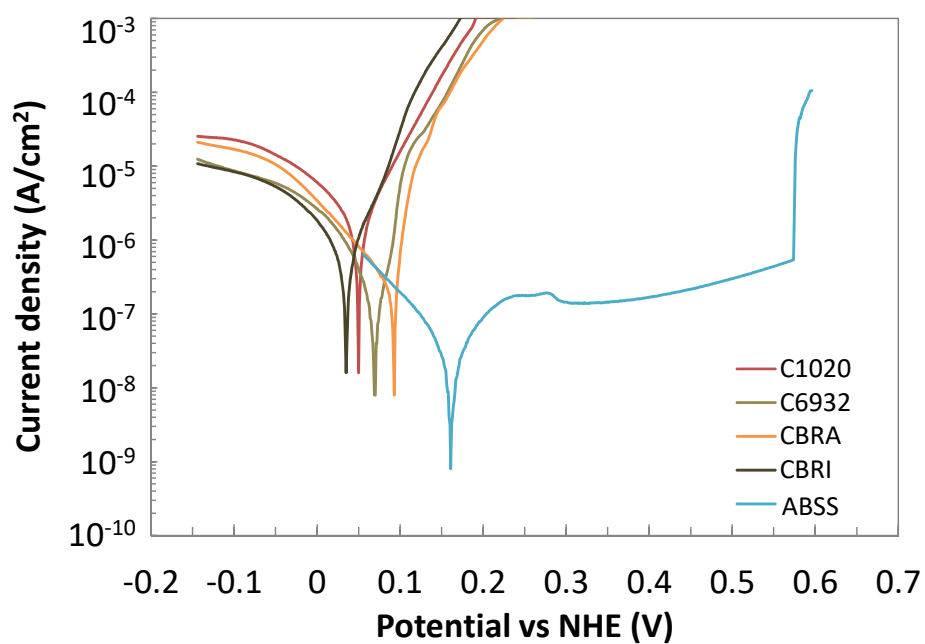

Figure S1. Potentiodynamic curves of copper and copper containing alloys in 0.9% NaCl. (Details of measuring conditions are described in the footnote of Table S2.)
